# Supplementary material for: A novel lineage of candidate pheromone receptors for sex communication in moths
Source: eLife. 2019 Dec 10;8:e49826. doi: 10.7554/eLife.49826 (PMC6904214; doi:10.7554/eLife.49826)
Supplement: Figure 1—source data 1. [file elife-49826-fig1-data1.xlsx]

## Sheet: Fig.1A RT-qPCR
	Mean Normalized Expression of SlitOr5
Group 1 of male antennae	0.0051038175894791
Group 2 of male antennae	0.00163020013341708
Group 3 of male antennae	0.00426328337622331
Group 1 of female antennae	0.0000551222359553517
Group 2 of female antennae	0.0000462960025963641
Group 3 of female antennae	0.000099769692699595
