# Supplementary material for: A novel lineage of candidate pheromone receptors for sex communication in moths
Source: eLife. 2019 Dec 10;8:e49826. doi: 10.7554/eLife.49826 (PMC6904214; doi:10.7554/eLife.49826)
Supplement: Figure 2—source data 1. [file elife-49826-fig2-data1.xlsx]

## Sheet: Fig.2A SSR on Drosophila OSNs
Response (spikes/s)
	OSN 1	OSN 2	OSN 3	OSN 4	OSN 5	OSN 6	OSN 7	OSN 8
Z5-10:OAc	-2	4	0	2	-2	-2	2	4
12:OAc	-8	-2	-4	-4	4	2	2	0
E7-12:OAc	2	-2	0	0	0	0	0	-6
Z7-12:OAc	0	-16	-4	4	0	2	2	4
Z7-12:OH	8	10	2	10	0	2	6	2
Z9-12:OAc	8	18	20	-2	12	2	0	-2
Z7,E9-12:OAc	-2	-2	4	14	4	0	0	2
∆11-12:OAc	0	4	-2	8	2	0	4	4
14:OAc	4	0	4	4	-4	0	-2	4
Z9-14:OAc	0	22	44	8	-2	4	0	-2
Z9-14: OH	-2	-8	-2	8	4	-2	0	2
Z9-14:Al	0	4	0	-4	2	0	0	0
E11-14:OAc	2	14	10	2	6	-2	0	0
Z9,E11-14:OAc	166	110	76	68	26	34	42	26
Z9,E11-14:OH	4	10	10	0	-4	0	0	-4
Z11-14:OAc	4	0	-2	0	0	-2	2	-2
Z9,Z11-14:OAc	16	18	58	12	0	2	0	2
E9E12-14:OAc	0	4	20	12	0	2	0	0
Z9,E12-14:OAc	4	12	24	10	2	0	0	0
Z9,E12-14:OH	14	8	0	0	4	2	0	2
E10,E12-14Ac	4	-2	-2	0	0	2	0	-2
Z9Z12-14:OAc	-4	2	36	16	2	0	0	6
Z9-16:Al	-8	2	0	6	10	0	0	4
Z11-16:OAc	-4	-4	2	6	10	2	0	2
Z11-16:OH	0	0	0	0	0	0	2	2
Z11-16:Al	-12	0	2	0	10	0	-2	-2
hexane	0	-2	0	0	8	2	2	0

## Sheet: Fig.2B TEVC on Xenopus oocytes
Current (nA)
	Oocyte 1	Oocyte 2	Oocyte 3	Oocyte 4	Oocyte 5	Oocyte 6	Oocyte 7	Oocyte 8	Oocyte 9	Oocyte 10	Oocyte 11	Oocyte 12	Oocyte 13	Oocyte 14	Oocyte 15	Oocyte 16
Z5-10:OAc	0	0	0	0	0	0	0	0	0	0	0	0	0	0	0	0
12:OAc	0	0	0	0	0	0	0	0	0	0	0	0	0	0	0	0
E7-12:OAc	0	0	0	0	0	0	0	0	0	0	0	0	0	0	0	0
Z7-12:OAc	0	0	0	0	0	0	0	0	0	0	0	0	0	0	0	0
Z7-12:OH	0	0	0	0	0	0	0	0	0	0	0	0	0	0	0	0
Z9-12:OAc	188.3	127		100.1	73.9	879.8	164.2	214.8	269.5			206.3	147.1	123.3	186.8	221.6
Z7,E9-12:OAc	0	0	0	0	0	0	0	0	0	0	0	0	0	0	0	0
∆11-12:OAc	0	0	0	0	0	0	0	0	0	0	0	0	0	0	0	0
14:OAc	0	0	0	0	0	0	0	0	0	0	0	0	0	0	0	0
Z9-14:OAc	0	0	0	0	0	0	0	0	0	0	0	0	0	0	0	0
Z9-14: OH	0	0	0	0	0	0	0	0	0	0	0	0	0	0	0	0
Z9-14:Al	0	0	0	0	0	0	0	0	0	0	0	0	0	0	0	0
E11-14:OAc	0	0	0	0	0	0	0	0	0	0	0	0	0	0	0	0
Z9,E11-14:OAc	2702.6	2422.8	4981.1	2424.9	3325.2	3345.6	5952.8	3978	4916.4	2736.5	4985.7	3668.2	4864.5	5484.6	3309	2747.3
Z9,E11-14:OH	0	0	0	0	0	0	0	0	0	0	0	0	0	0	0	0
Z11-14:OAc	0	0	0	0	0	0	0	0	0	0	0	0	0	0	0	0
Z9,Z11-14:OAc	0	0	0	0	0	0	0	0	0	0	0	0	0	0	0	0
E9E12-14:OAc	0	0	0	0	0	0	0	0	0	0	0	0	0	0	0	0
Z9,E12-14:OAc	632.9	585.6	876.5	377.5	510.6	435.5		623.5	811.8	549.3	873.1	1109	712.9	522.5	468.8	466.4
Z9,E12-14:OH	0	0	0	0	0	0	0	0	0	0	0	0	0	0	0	0
E10,E12-14Ac	0	0	0	0	0	0	0	0	0	0	0	0	0	0	0	0
Z9Z12-14:OAc	0	0	0	0	0	0	0	0	0	0	0	0	0	0	0	0
Z9-16:Al	0	0	0	0	0	0	0	0	0	0	0	0	0	0	0	0
Z11-16:OAc	0	0	0	0	0	0	0	0	0	0	0	0	0	0	0	0
Z11-16:OH	0	0	0	0	0	0	0	0	0	0	0	0	0	0	0	0
Z11-16:Al	0	0	0	0	0	0	0	0	0	0	0	0	0	0	0	0

## Sheet: Fig.3C Tip recording LT1A OSNs
Response (spikes/s)
	OSN 1	OSN 2	OSN 3	OSN 4	OSN 5	OSN 6	OSN 7	OSN 8	OSN 9	OSN 10	OSN 11	OSN 12	OSN 13	OSN14	OSN 15	OSN16
Z5-10:OAc	0	8	0	2	0	0	0	0	0
12:OAc	12	0	2	0	2	0	0	2	0
E7-12:OAc	0	0	0	4	0	0	0	0	10
Z7-12:OAc	0	0	8	0	6	4	0	0	12
Z7-12:OH	0	0	0	0	4	4	0	4
Z9-12:OAc	0	0	0	12	0	0	0	14
Z7,E9-12:OAc	0	0	0	10	0	0	14	0
∆11-12:OAc	0	0	0	0	0	0	0	8
14:OAc	0	0	0	0	0	2	0	0
Z9-14:OAc	0	8	0	14	6	2	2	0
Z9-14: OH	0	0	0	0	0	0	4	2
Z9-14:Al	12	0	0	0	0	0	0	0
E11-14:OAc	6	0	22	0	0	0	0	4
Z9,E11-14:OAc	32	62	64	60	48	66	48	62
Z9,E11-14:OH	0	0	14	2	0	0	0	0
Z11-14:OAc	0	0	2	0	0	0	0	0
Z9,Z11-14:OAc	22	46	44	0	6	4	0	20	14	18	2	8	0	12	14	6
E9E12-14:OAc	0	12	0	4	0	0	0	0
Z9,E12-14:OAc	8	14	28	12	2	4	0	0	0
Z9,E12-14:OH	0	0	0	0	0	2	0	0
E10,E12-14Ac	16	0	0	6	0	0	0	0	0
Z9Z12-14:OAc	2	18	0	8	0	2	0	4
Z9-16:Al	0	0	0	0	0	0	0	0	0
Z11-16:OAc	0	6	0	0	0	0	0	0
Z11-16:OH	0	0	2	0	0	0	0	0	0
Z11-16:Al	0	6	0	0	0	0	0	0
hexane	0	2	6	10	0	4	0	0

## Sheet: Fig.3E Dose response Xenopus
Current (nA)
Concentration of (Z,E)-9,11-14:OAc	Oocyte 1	Oocyte 2	Oocyte 3	Oocyte 4	Oocyte 5	Oocyte 6	Oocyte 7	Oocyte 8	Oocyte 9
1e-09	0	0	0	0	0	0	0	0	0
1e-08	188.3	212.7	253.6	176.4	199.3	136.1	93.7	139.2	144.3
3e-08	605.8	773.9	430.6	621.6	657.7	419	218.2	493.8	437.6
1e-07	1326	1819.5	753.2	1601.9	1862.5	1092.8	789.5	1159.4	1048.9
1e-06	3585.2		4254.2	3620.3	4518.4	3496.1	4414.1	4546.2	4184
1e-05	3003.5		5175.2	4141.8	3496.7		4484.9	4283.1	4093
