# Supplementary material for: A novel lineage of candidate pheromone receptors for sex communication in moths
Source: eLife. 2019 Dec 10;8:e49826. doi: 10.7554/eLife.49826 (PMC6904214; doi:10.7554/eLife.49826)
Supplement: Figure 3—source data 1. [file elife-49826-fig3-data1.xlsx]

## Sheet: Fig.3B EAG on S. littoralis
EAG amplitude (mV)
	Homozygous SlitOr5 mutants				Heterozygous SlitOr5 mutants				Wild-type animals
	(Z,E)-9,11-14:OAc	(Z,E)-9,12-14:OAc	(±)-linalool	benzyl alcool	(Z,E)-9,11-14:OAc	(Z,E)-9,12-14:OAc	(±)-linalool	benzyl alcool	(Z,E)-9,11-14:OAc	(Z,E)-9,12-14:OAc	(±)-linalool	benzyl alcool
Indvidual 1	0.09	0.35	0.37	1	1.18	0.59	0.21	0.68	1.21	0.5	0.32	0.94
Indvidual 2	0.07	0.34	0.37	1.06	0.79	0.53	-0.11	0.48	1.41	0.97	0.07	0.51
Indvidual 3	0.09	0.31	0.33	0.88	0.98	0.58	0.25	0.63	0.69	0.53	0.19	0.62
Indvidual 4	0.04	0.49	0.54	1.19	0.9	0.37	0.25	0.73	0.98	0.71	0.12	0.57
Indvidual 5	0	0.53	0.43	0.92	1.1	0.42	0.39	0.97	0.84	0.31	-0.1	0.45
Indvidual 6	-0.08	0.17	0.48	0.81	0.71	0.26	0.24	0.61	1.04	0.32	0.27	0.87
Indvidual 7	-0.06	0.3	0.36	0.91	0.93	0.5	0.44	0.81	1.19	0.77	0.2	0.48
Indvidual 8	-0.02	0.42	0.26	0.45	1.65	0.69	0.41	0.67	1.47	0.7	0.45	0.95
Indvidual 9					0.63	0.52	0.5	0.41	1.27	0.83	0.33	1.29
Indvidual 10					0.98	-0.18	0.27	0.66	1.35	0.89	0.41	0.95
Indvidual 11					0.92	0.34	0.22	0.8	1.39	1.01	0.59	1.37
Indvidual 12					0.62	0.26	0.14	0.58	1.13	0.91	0.67	1.28
Indvidual 13					0.53	0.19	0.17	0.39	1.76	0.95	0.41	0.73
Indvidual 14					0.5	0.24	0.27	0.69	0.92	0.43	0.4	0.28
Indvidual 15									0.7	0.21	0.23	0.5
Indvidual 16									0.84	0.29	0.21	0.4
Indvidual 17									1.81	0.82	0.49	0.98
Indvidual 18									0.82	0.42	0.55	0.73
