# Supplementary material for: A novel lineage of candidate pheromone receptors for sex communication in moths
Source: eLife. 2019 Dec 10;8:e49826. doi: 10.7554/eLife.49826 (PMC6904214; doi:10.7554/eLife.49826)
Supplement: Figure 3—source data 2. [file elife-49826-fig3-data2.xlsx]

## Sheet: Fig. 3C
courtship experiments: latency of behavioral items (seconds)
	antennal flicking			movement toward the source			wing fanning			abdomen curving			extrusion of genitalia
	WT + phero	WT + solvent	mutant + phero	WT + phero	WT + solvent	mutant + phero	WT + phero	WT + solvent	mutant + phero	WT + phero	WT + solvent	mutant + phero	WT + phero	WT + solvent	mutant + phero
Indvidual 1	48	no behavior	no behavior	189	no behavior	no behavior	212	no behavior	no behavior	230	no behavior	no behavior	249	no behavior	no behavior
Indvidual 2	17	no behavior	no behavior	55	no behavior	no behavior	52	no behavior	no behavior	236	no behavior	no behavior	764	no behavior	no behavior
Indvidual 3	218	no behavior	no behavior	238	no behavior	no behavior	225	no behavior	no behavior	1294	no behavior	no behavior	1471	no behavior	no behavior
Indvidual 4	20	no behavior	no behavior	23	no behavior	no behavior	33	no behavior	no behavior	1738	no behavior	no behavior	1781	no behavior	no behavior
Indvidual 5	41	no behavior	no behavior	48	no behavior	no behavior	1241	no behavior	no behavior	1213	no behavior	no behavior	1264	no behavior	no behavior
Indvidual 6	31	no behavior	no behavior	39	no behavior	no behavior	53	no behavior	no behavior	133	no behavior	no behavior	153	no behavior	no behavior
Indvidual 7	162	no behavior	32	184	no behavior	59	198	no behavior	44	222	no behavior	120	no behavior	no behavior	no behavior
Indvidual 8	267	877	1	268	890	24	364	877	10	375	900	138	399	no behavior	159
Indvidual 9	16	no behavior	no behavior	43	no behavior	no behavior	15	no behavior	no behavior	67	no behavior	no behavior	1185	no behavior	no behavior
Indvidual 10	142	367	1592	145	386	1605	174	307	141	328	445	1615	682	926	1612
Indvidual 11	4	143	1602	29	146	1602	13	142	1484	60	246	1634	73	no behavior	1652
Indvidual 12	17	no behavior	347	25	no behavior	387	13	no behavior	368	692	no behavior	432	706	no behavior	444
Indvidual 13	99	no behavior	136	192	127	138	185	111	92	no behavior	111	159	no behavior	242	235
Indvidual 14	24	no behavior	no behavior	398	no behavior	no behavior	121	no behavior	no behavior	923	no behavior	no behavior	968	no behavior	no behavior
Indvidual 15	19	999		31	1083		26	1010		40	1116		47	no behavior
Indvidual 16	49	no behavior		429	no behavior		428	no behavior		439	no behavior		447	no behavior
Indvidual 17	57	no behavior		273	no behavior		265	no behavior		337	no behavior		no behavior	no behavior
Indvidual 18	292	550		292	1053		267	568		301	1067		324	no behavior
Indvidual 19	285	389		285	399		285	374		303	no behavior		283	no behavior
Indvidual 20	149	no behavior		161	no behavior		162	no behavior		165	no behavior		165	no behavior
Indvidual 21	52	no behavior		96	no behavior		94	no behavior		137	no behavior		213	no behavior
Indvidual 22	820	no behavior		825	no behavior		838	no behavior		879	no behavior		904	no behavior
Indvidual 23	30	4		348	4		365	4		381	4		404	no behavior
Indvidual 24	97	no behavior		117	no behavior		115	no behavior		142	no behavior		156	no behavior
Indvidual 25	no behavior	no behavior		no behavior	no behavior		168	no behavior		no behavior	no behavior		no behavior	19
Indvidual 26	171	no behavior		173	no behavior		170	no behavior		229	no behavior		255	no behavior
Indvidual 27	no behavior	110		no behavior	117		no behavior	no behavior		no behavior	no behavior		no behavior	no behavior
Indvidual 28	244	no behavior		246	507		244	391		no behavior	562		no behavior	no behavior
Indvidual 29	1141	no behavior		1143	no behavior		1145	no behavior		1189	no behavior		1215	no behavior
Indvidual 30	123	449		125	485		140	10		164	520		167	no behavior
Indvidual 31	1548	174		1633	189		1631	182		1651	no behavior		1657	no behavior
Indvidual 32	172	no behavior		173	no behavior		171	no behavior		206	no behavior		329	no behavior
Indvidual 33	962	no behavior		968	no behavior		968	no behavior		1020	no behavior		1037	no behavior
Indvidual 34	15	301		19	no behavior		54	282		196	no behavior		227	no behavior
Indvidual 35	168	no behavior		193	no behavior		214	no behavior		no behavior	no behavior		no behavior	no behavior
Indvidual 36	153	857		153	910		97	877		154	1114		171	no behavior
Indvidual 37		no behavior			no behavior			no behavior			no behavior			no behavior
Indvidual 38		no behavior			no behavior			no behavior			no behavior			1137
Indvidual 39		no behavior			no behavior			no behavior			no behavior			no behavior
Indvidual 40		no behavior			no behavior			no behavior			no behavior			no behavior
Indvidual 41		no behavior			no behavior			no behavior			no behavior			no behavior
Indvidual 42		32			59			44			120			no behavior
Indvidual 43		1			24			10			138			159
Indvidual 44		no behavior			no behavior			no behavior			no behavior			no behavior

## Sheet: Fig. 3D-E
mating experiments
	Homozygous SlitOr5 mutants			Wild-type animals
	mating	laid eggs	offspring	mating	laid eggs	offspring
Indvidual 1	no	0	0	yes	580	0
Indvidual 2	no	0	0	no	0	0
Indvidual 3	no	0	0	yes	35	0
Indvidual 4	yes	726	726	yes	223	223
Indvidual 5	no	0	0	no	0	0
Indvidual 6	no	0	0	yes	411	410
Indvidual 7	no	0	0	yes	0	0
Indvidual 8	no	0	0	yes	480	480
Indvidual 9	no	0	0	yes	0	0
Indvidual 10	no	0	0	yes	320	320
Indvidual 11	no	0	0	yes	82	58
Indvidual 12	no	170	0	yes	650	650
Indvidual 13	no	0	0	no	0	0
Indvidual 14				no	58	0
Indvidual 15				yes	29	5
Indvidual 16				yes	583	540
Indvidual 17				yes	387	367
Indvidual 18				yes	640	640
Indvidual 19				yes	178	150
Indvidual 20				no	0	0
Indvidual 21				yes	544	541
Indvidual 22				yes	330	39
Indvidual 23				yes	377	270
Indvidual 24				yes	0	0
Indvidual 25				yes	30	30
Indvidual 26				yes	0	0
Indvidual 27				yes	0	0
Indvidual 28				no	0	0
Indvidual 29				yes	520	520
Indvidual 30				yes	0	0
Indvidual 31				yes	166	158
Indvidual 32				yes	0	0
Indvidual 33				yes	313	300
Indvidual 34				yes	0	0
Indvidual 35				no	0	0
Indvidual 36				yes	290	290
Indvidual 37				yes	414	0
Indvidual 38				yes	17	0
Indvidual 39				no	0	0
Indvidual 40				yes	573	538
Indvidual 41				no	0	0
Indvidual 42				no	0	0
Indvidual 43				yes	491	480
Indvidual 44				yes	942	925
Indvidual 45				yes	382	370
Indvidual 46				yes	649	617
Indvidual 47				no	781	770
Indvidual 48				no	823	820
Indvidual 49				yes	568	465
